# Supplementary material for: Engaging Holistic Health through Active Design in Public Space
Source: Royal Society of Chemistry journal article supplement (doi:10.1039/b311492a), 2014-01-01
Supplement: b311492a.doc [file b311492a.doc]

**Supplementary Information**

**EXPERIMENTAL SECTION**

**General.** Melting points were determined on open capillaries and are uncorrected. Analytical TLC was performed using Merck glass-backed 0.2 mm silica gel 60 F-254 plates. Visualization was done with UV light and staining with anisaldehyde solution [anisaldehyde (5.0 mL), AcOH (3.5 mL) and H2SO4 (6 mL) in EtOH (200 mL)] followed by heating. Centrifugal chromatography was used to purify the crude products using Merck silica gel 60 PF-254 containing gypsum (art. no. 1.07749.2500). Infrared spectra were recorded on a Perkin-Elmer 1600 series FTIR instrument. NMR spectra were recorded for 1H at 270 MHz and 400 MHz, for 13C NMR at 67.8 MHz and 100 MHz at 25 oC. Chemical shifts for 1H and 13C were referenced to TMS via the solvent signals (1H, CHCl3 at 7.26 ppm; 13C, CDCl3 at 77.0 ppm). Low-resolution mass spectra were recorded on a Varian GC-MS instrument equipped with a CP-Sil 8 CB capillary column (30 m  0.25 mm, 0.25 μm) operating at an ionization energy of 70 eV. The oven temperature was 40-300 C. Elemental analyses were performed by Analytische Laboratorien Lindlar Germany. Balloons (11 in. when 80% inflated) were procured from Aldrich. Palladium(II) acetate was purchased from Strem. The arylboronic acids were received from Aldrich, Lancaster, Frontier Scientific, Boron molecular and Acros. Anhydrous DMSO, MeCN, EtCN, toluene and 1,4-dioxane were obtained from Aldrich. All other reagents were purchased from commercial sources and used as received.

All reagents were weighed in air and the reactions were conducted under an atmosphere of oxygen (AR Grade), unless otherwise indicated. The arylated products were obtained in (*E*)-configuration, if not otherwise noted. The product, *n*-butyl cinnamate (Table **1**) is commercially available. The known products in Table **2** gave satisfactory analytical data corresponding to the reported literature values. The analytical data are provided for new compounds in Table **2** herewith (*vide infra*).

**General Procedure for Arylation. Condition (A):** Arylboronic acid (2.0 mmol), Pd(OAc)2 (0.0023 g, 0.01 mmol), and 2,9-dimethyl-1,10-phenanthroline (0.0026 g, 1.20 mmol) were weighed in a RB flask (10.0 mL). *N*-Methylmorpholine (0.22 mL, 2.0 mmol), olefin (1.0 mmol) and MeCN (3.0 mL) were then added. The oxygen-filled balloon was then attached and the mixture vigorously stirred at the specified temperature and time. After cooling to room temperature, the balloon was removed, the mixture diluted with water (4 mL) and ethyl acetate (4 mL) and the content transferred into a separatory funnel. The RB flask was washed further with ethyl acetate (3  5 mL) and water (3  5 mL). The combined pool was partitioned and the organic layer washed with water, and brine, dried over anhydrous MgSO4 (s) and concentrated *in vacuo*. The residue was purified by centrifugal chromatography using hexane or a mixture of hexane and ethyl acetate as eluent to afford the pure product.

**Condition (B):** The above procedure was followed except the amount of Pd(OAc)2 (0.0045, 0.02 mmol) and 2,9-dimethyl-1,10-phenanthroline (0.0052 g, 2.40 mmol).

**ANALYTICAL DATA FOR NEW COMPOUNDS**

***n*-Butyl (*E*)-(3,5-dibromophenyl)acrylate**

Following the general procedure **(**Condition **B)**, the residue was purified by centrifugal chromatography (silica gel 60, hexane as eluent) to afford the title product as a colourless solid (0.243 g, 67%). M.p. 68-69 oC; 1H NMR (270 MHz, CDCl3): *δ* 0.96 (m, 3H), 1.42 (m, 2H), 1.68 (m, 2H), 4.20 (t, 2H, *J* = 6.6 Hz), 6.42 (d, 1H, *J* = 16.0 Hz), 7.51 (d, 1H, *J* = 16.0 Hz), 7.57 (d, 2H, *J* = 1.7 Hz), 7.65 (t, 1H, *J* = 1.7 Hz);13C NMR (67.5 MHz, CDCl3): δ 13.7, 19.2, 30.7, 64.8, 121.1, 123.4, 129.5, 135.2, 137.9, 141.2, 166.2; (IR, CDCl3): 2967, 1710, 1550, 1315, 1187 cm-1; MS (*m/z*, relative intensity): 362 (M+, 100), 306 (25), 291 (19), 289 (37), 182 (20); Anal Calcd for {C13H14Br2O2}: C, 43.13; H, 3.90; Found: C, 43.03; H, 3.91.

**1-(1-Naphthyl)oct-1-en-3-one**

Following the general procedure **(Condition B)**, the residue was purified by centrifugal chromatography (silica gel 60, 5% ethyl acetate in hexane) to afford the title product as a colourless liquid (0.193 g, 77%). 1H NMR (400 MHz, CDCl3): *δ* 0.93 (m, 3H), 1.32-1.45 (m, 4H), 1.68-1.82 (m, 2H), 2.73 (t, 2H, *J* = 7.32 Hz), 6.84 (d, 1H, *J* = 16.1 Hz), 7.45- 7.62 (m, 3H), 7.78 (d, 1H, *J* = 6.96 Hz), 7.90 (t, 2H, *J* = 7.90 Hz), 8.19 (d, 1H, *J* = 8.42 Hz), 8.41 (d, 1H, *J* = 15. 7 Hz);13C NMR (100 MHz, CDCl3): *δ* 13.9, 22.5, 24.1, 31.5, 41.3, 123.3, 125.0, 125.4, 126.2, 126.9, 128.7, 128.8, 130.6, 131.6, 132.0, 133.7, 139.1; (IR, CDCl3): 2956, 2930, 1687, 1606 cm-1; MS (*m/z*, relative intensity): 252 (M+, 76), 196 (61), 181 (100), 152 (46) ; Anal Calcd for {C18H20O}: C, 85.67; H, 7.99; Found: C, 85.49; H, 8.09.

**1-(3-Bromophenyl)oct-1-en-3-one**

Following the general procedure **(Condition B)**, the residue was purified by centrifugal chromatography (silica gel 60, 5% ethyl acetate in hexane) to afford the title product as a colourless solid (0.205 g, 73%). M.p. 33-34 oC; 1H NMR (400 MHz, CDCl3): *δ* 0.48 (m, 3H), 0.85-0.97 (m, 4H), 1.2-1.3 (m, 2H), 2.21 (t, 2H, *J* = 7.5 Hz), 6.29 (dd, 1H, *J* = 16.2 Hz, *J* = 1.2 Hz), 6.83 (dt, 1H, *J* = 1.2 Hz, *J* = 7.8 Hz), 7.0-7.1 (m, 3H), 7.50-7.28 (m, 1H);13C NMR (100 MHz, CDCl3): δ 13.9, 22.4, 23.9, 31.4, 41.2, 123.0, 126.8, 127.2, 130.4, 130.8, 133.0, 136.7, 140.4, 200.2; (IR, CDCl3): 2930, 1693, 1613 cm-1; MS (*m/z*, relative intensity): 282 (M+, 11), 211 (100), 183 (31), 145 (86), 102 (78); Anal Calcd for {C14H17BrO}: C, 59.80; H, 6.09; Found: C, 59.95; H, 6.27;

**REFERENCES FOR KNOWN COMPOUNDS:**

***n*-Butyl (*E*)-(3,4-dioxymethylenephenyl)acrylate1**

***n*-Butyl (*E*)-(4-methylphenyl)acrylate1**

***n*-Butyl (*E*)-(4-methoxyphenyl)acrylate1**

***n*-Butyl (*E*)-(3-nitrophenyl)acrylate1**

**(*E*)-3-Styrylacetophenone2**

***n*-Butyl (*E*)-(3-iodophenyl)acrylate3**

***n*-Butyl (*E*)-(2-methoxyphenyl)acrylate1**

***n*-Butyl (*E*)-(2,4,6-trimethylphenyl)acrylate1**

**(*E*)-4-Ethoxystilbene4**

1. A. M. S. Murugaiah, P. Nilsson and M. Larhed, *Mol. Div.*, 2003, In Press and the references cited therein.
2. Y. Ito, T. Kajita, K. Kunimoto and T. Matsuura, *J. Org. Chem.*, 1989, **54**, 587.
3. E. J. Farrington, J. M. Brown, C. F. J. Barnard, and E. Roswell, *Angew. Chem.*, *Int. Ed.*, 2002, **41**, 169.
4. Y. Hatanaka, K. Goda and T. Hiyama, *J. Organomet. Chem.,* 1994, **465**, 97.
